# Supplementary material
Source: PubMed Central journal article supplement (PMC4086030)
Supplement: Supp_Figure1.pdf [file Supp_Figure1.pdf]

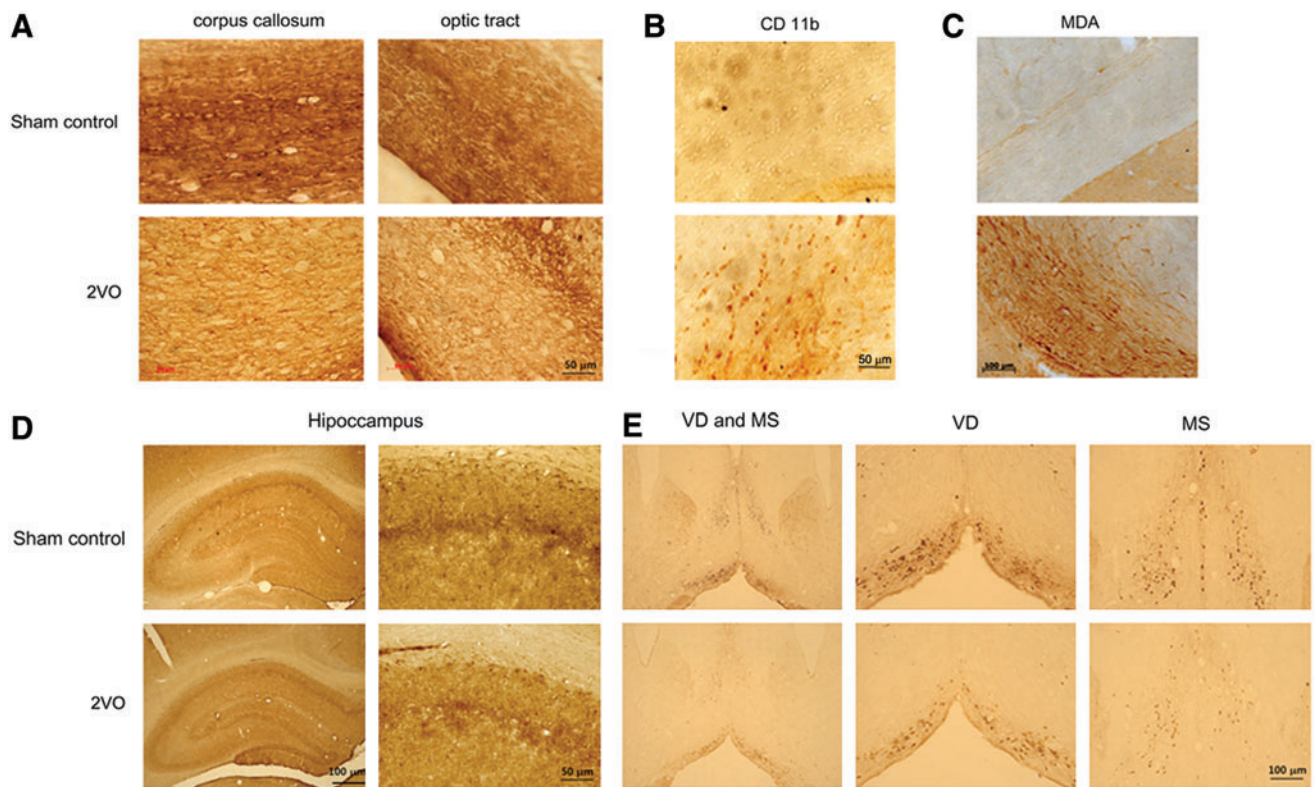

**SUPPLEMENTARY FIG. S1. Immunohistochemistry analysis of white matter, hippocampus, and basal forebrain of the sham control ( $n=4$ ) and 2VO-operated rats ( $n=4$ ).** (A) Myelin basic protein (MBP) in corpus callosum and optic tract (B) microglia activation marker, CD11b in white matter (C) lipid peroxidation marker (malondialdehyde [MDA]) in optic tract, (D) cholinergic neuronal marker, choline acetyl-transferase (ChAT) in hippocampus, and (E) ChAT in basal forebrain (VD, vertical diagonal band; MS, medial septal nucleus).
