# Supplementary material
Source: PubMed Central journal article supplement (PMC4086030)
Supplement: Supp_Figure3.pdf [file Supp_Figure3.pdf]

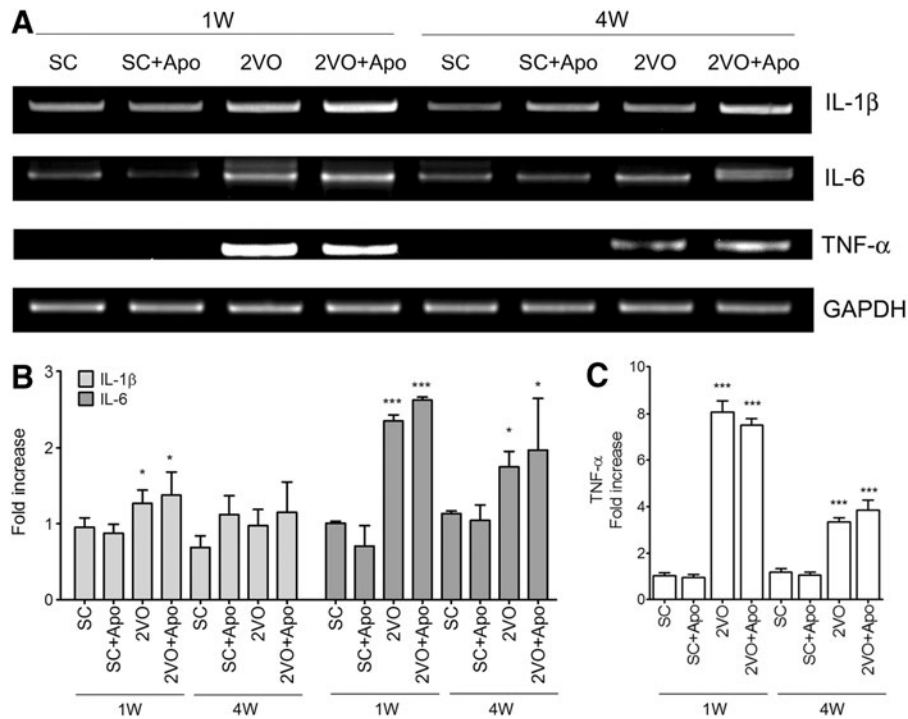

**SUPPLEMENTARY FIG. S3. Increased expressions of IL-1 $\beta$ , IL-6, and TNF- $\alpha$  mRNA in the common carotid artery of 2VO-operated rats.** (A) A representative PCR of IL-1 $\beta$ , IL-6, and TNF- $\alpha$  mRNA in common carotid artery at 1 and 4 weeks after 2VO operation treated with apocynin or vehicle. (B, C) The fold change for a target gene, as compared with sham control (SC), was calculated as  $2^{-\Delta\Delta C_t}$ , where  $-\Delta\Delta C_t = (C_{t, target\ gene} - C_{t, GAPDH})_{test\ condition} - (C_{t, target\ gene} - C_{t, GAPDH})_{sham\ control}$ . GAPDH, internal control. \* $p < 0.05$ , \*\*\* $p < 0.001$  versus sham-operated rats (SC). SC+Apo, sham-operated rats treated with apocynin (10 mg/kg/day for 8 weeks); 2VO control, 2VO-operated rats treated with vehicle; 2VO+Apo, 2VO-operated rats treated with apocynin. GAPDH, glyceraldehyde 3-phosphate dehydrogenase; IL-1 $\beta$ , interleukin-1beta; TNF- $\alpha$ , tumor necrosis factor alpha.
