# Supplementary material
Source: PubMed Central journal article supplement (PMC4086030)
Supplement: Supp_Figure4.pdf [file Supp_Figure4.pdf]

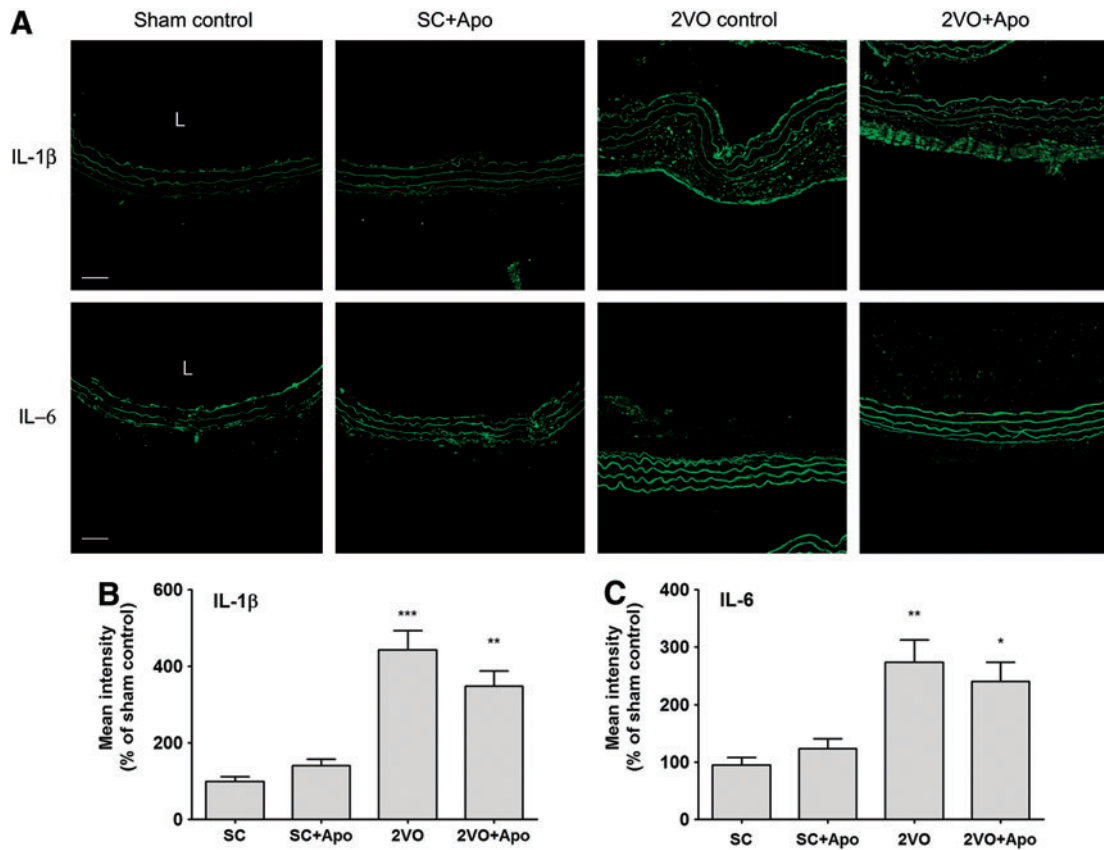

**SUPPLEMENTARY FIG. S4. Increased expression of IL-1 $\beta$ , IL-6 in the common carotid artery of 2VO-operated rats is not altered by apocynin.** (A) Representative photographs of tissue sections stained with IL-1 $\beta$  (green) and IL-6 (green) antibody from rat common carotid artery taken from sham-operated group (SC,  $n=6$ ) and 2VO ( $n=6$ )-operated rats treated with apocynin or vehicle at 1 week after the operation. Scale bar = 50  $\mu\text{m}$ ; L, lumen. (B, C) Signal mean intensity was measured by ZEN 2009 Light Edition software and was shown as a % of sham control. \* $p < 0.05$ , \*\* $p < 0.01$ , \*\*\* $p < 0.001$  versus sham-operated rats. Sham control, sham-operated rats treated with vehicle; SC + Apo, sham-operated rats treated with apocynin (10 mg/kg/day for 1 week); 2VO control, 2VO-operated rats treated with vehicle; 2VO + Apo, 2VO-operated rats treated with apocynin.
