# Supplementary material
Source: PubMed Central journal article supplement (PMC4086030)
Supplement: Supp_Figure5.pdf [file Supp_Figure5.pdf]

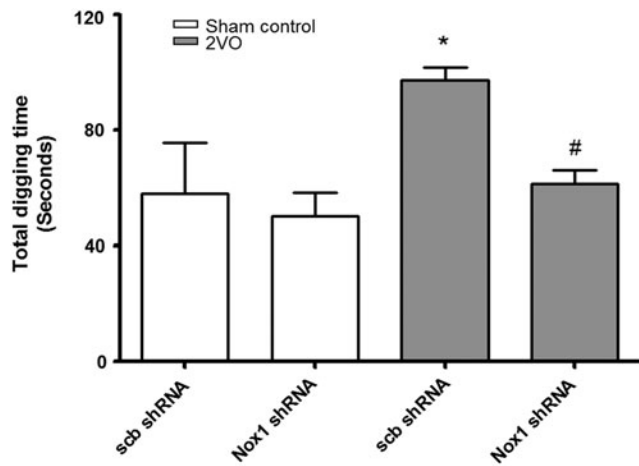

**SUPPLEMENTARY FIG. S5. The olfactory discrimination test ( $n=8/\text{group}$ ) was performed at 13 weeks after 2VO.  $*p < 0.05$  versus sham-operated rats injected with scramble shRNA (scb shRNA/Sham control);  $\#p < 0.05$  versus 2VO rats injected with scramble shRNA (scb shRNA/2VO). Sham control, Sham-operated rats; 2VO, 2VO-operated rats; Scb shRNA, rats injected with scramble shRNA AAV particles; Nox1 shRNA, rats injected with Nox1 shRNA AAV particles.**
