# Supplementary material
Source: PubMed Central journal article supplement (PMC4086030)
Supplement: Supp_Figure6.pdf [file Supp_Figure6.pdf]

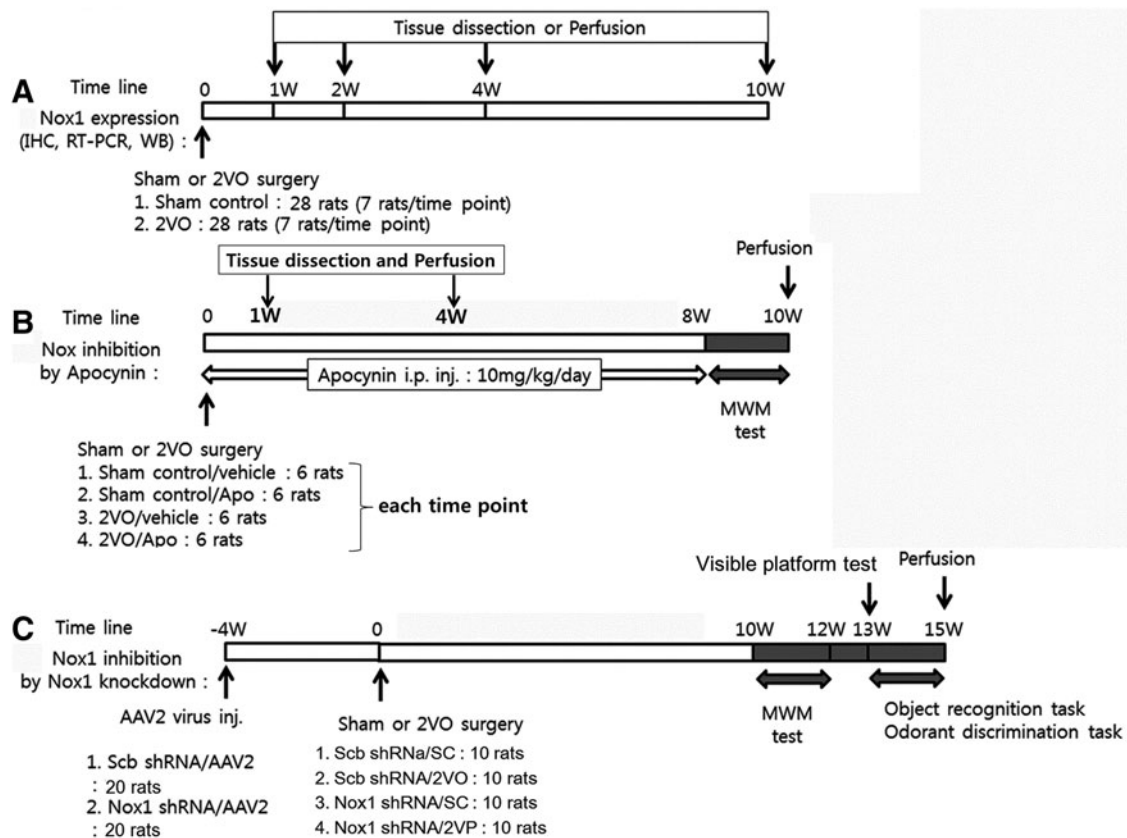

**SUPPLEMENTARY FIG. S6. Allocation table for each group and the timeline of the experiment.** Rats submitted to sham operation (sham-op) or permanent occlusion of bilateral common carotid arteries (2VO). Mortality and blindness occurred only in rats with 2VO. Escape latency longer than mean plus three SD of sham-op rats was used as an arbitrary cut-off to determine blindness (total blinded rats,  $n=7$ ). **(A)** Sham-op and 2VO rats were used for gene expression studies (RT-PCR,  $n=3$ , the left hemisphere of the brain) and protein expression studies (western blots,  $n=3$ , the right hemisphere of the brain) and immunohistochemical analysis (immunohistochemistry,  $n=3$  or 4) at 1, 2, 4, and 10 weeks after operation. **(B)** Rats submitted to sham-op or 2VO that were treated with apocynin (Apo, IP injection of 10 mg/kg/day apocynin) or vehicle from days 0–56 post-2VO were used for behavioral analysis ( $n=6$ /group) and immunohistochemical analysis ( $n=6$ /group). Proinflammatory cytokine gene expression studies (real-time PCR,  $n=3$ ) and immunohistochemical analysis in common carotid artery (immunohistochemistry,  $n=6$ ) were carried out at 1 and 4 weeks after 2VO operation treated with apocynin or vehicle. **(C)** In Nox1 knockdown study, AAV particles containing either Nox1 shRNA/AAV (Nox1shRNA) or Scb shRNA were stereotactically injected into hippocampal CA1 subfield at 4 weeks before the 2VO or sham-op. Rats were allocated into four groups: sham-op rats injected with scramble shRNA AAV particles (ScbRNA control,  $n=10$ ), sham-op rats injected with Nox1 shRNA AAV particles (Nox1shRNA control,  $n=10$ ), 2VO rats injected with scramble shRNA AAV particles (ScbRNA 2VO,  $n=10$ ), and 2VO rats injected with Nox1 shRNA AAV particles (Nox1 shRNA 2VO,  $n=10$ ). All groups were used for behavioral analysis (except Nox1shRNA control) from 10 weeks postoperation and for immunohistochemical analysis ( $n=5$ /group) at 15 weeks postoperation. Seven rats that failed behavioral training have been excluded from animals for odorant discrimination tasks ( $n=8$ /group). All animals were sacrificed at 1 day after the behavioral test for histological study. 2VO, two-vessel occlusion; NADPH, nicotinamide adenine dinucleotide phosphate; Nox1, NADPH oxidase 1; RT-PCR, reverse transcription–polymerase chain reaction.
